# Supplementary material for: Development of a Candidate TMV Epitope Display Vaccine against SARS-CoV-2
Source: MDPI journal article supplement (doi:10.3390/vaccines12050448), 2024-04-23

Supplementary Material.

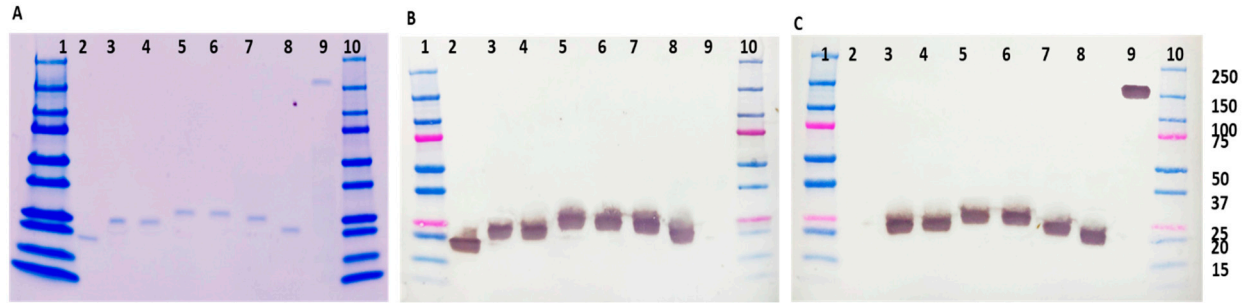

**Figure S1.** The images show analysis of the TMV-epitope constructs using SDS-PAGE (A); western blots were carried out using either anti-TMV (B); or anti-SARS-CoV2 S (C) polyclonal antibody. The blots were loaded as follows: Lane 1: Prestained molecular weight marker (BioRad). Lane 2: TMV-A, Lane 3 TMV-D, Lane 4: TMV-F, Lane 5: TMV-H, Lane 6: TMV-H, Lane 7: TMV-L, Lane 8: TMV-S21P2, Lane 9: SARS-CoV2 spike protein, Lane 10: Ladder

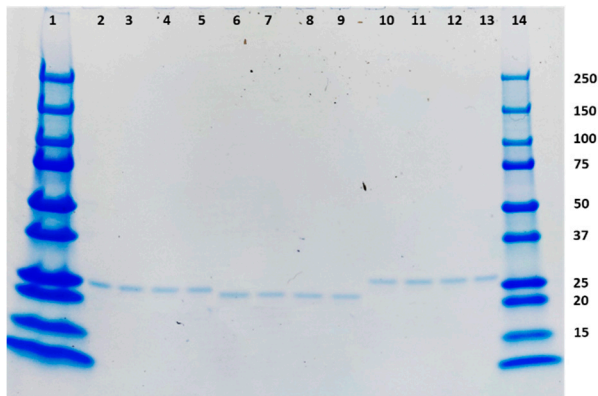

**Figure S2.** Coomassie-stained SDS-PAGE showing the stability of the three TMV-epitope fusions that elicited neutralizing antibodies in mice after storage at -20°C, 4°C, 25°C and 37°C for 28 days. The loading order is as follows: Lane 1: Prestained molecular weight marker (BioRad). Lane 2-5: TMV-A (-20°C, 4°C, 25°C, 37°C), Lane 6-9 TMV-D(-20°C, 4°C, 25°C, 37°C) , Lane 10-13: TMV-H(-20°C, 4°C, 25°C, 37°C) Lane 14: Prestained molecular weight marker (BioRad)

**Table S2.** Protein and nucleotide sequences of epitopes used in this study

| Name     | Position | Epitope Sequence                                                                                                                                                                                                                                                                                                                                 |
|----------|----------|--------------------------------------------------------------------------------------------------------------------------------------------------------------------------------------------------------------------------------------------------------------------------------------------------------------------------------------------------|
| <b>A</b> | 300-330  | KCTLKSFTVEKGIYQTSNFRVQPTESIVRFP                                                                                                                                                                                                                                                                                                                  |
|          |          | aagtgtacgttgaaatccttcactgtagaaaaaggaatctatcaaacttctaactttagagtccaaccaacagaatctattgttagatttccttag                                                                                                                                                                                                                                                 |
|          |          |                                                                                                                                                                                                                                                                                                                                                  |
| <b>B</b> | 365-395  | YSVLNSASFSTFKCYGVSPTKLNDLCFTNV                                                                                                                                                                                                                                                                                                                   |
|          |          | tattctgtcctatataattccgcatcatttccacttttaagtgttatggagtgtctctactaaattaatgatctctgttactaattgtctag                                                                                                                                                                                                                                                     |
|          |          |                                                                                                                                                                                                                                                                                                                                                  |
| <b>C</b> | 420-440  | DYNYKLDDFTGCVIAWNSNN                                                                                                                                                                                                                                                                                                                             |
|          |          | gattataattataaattaccagatgattttacaggctgcgttatagcttgaattctaacaattag                                                                                                                                                                                                                                                                                |
|          |          |                                                                                                                                                                                                                                                                                                                                                  |
| <b>D</b> | 435-480  | AWNSNNLDSKVGGNYNYLYRLFRKSNLKPFERDISTEIQAGSTPC                                                                                                                                                                                                                                                                                                    |
|          |          | gcttgaattctaacaatcttgattctaaggttggtggaattataattacgttatagattgttaggaagtctaactctaaacctttgagagagatattcaactgaaatctatcaggccggttagcacacctgttag                                                                                                                                                                                                          |
|          |          |                                                                                                                                                                                                                                                                                                                                                  |
| <b>E</b> | 420-500  | DYNYKLDDFTGCVIAWNSNNLDSKVGGNYNYLYRLFRKSNLKPFERDISTEIQAGSTPCNGVEGFNCYFPLQSYGFQPT                                                                                                                                                                                                                                                                  |
|          |          | gattataattataaattaccagatgattttacaggctgcgttatagcttgaattctaacaatcttgattctaaggttggtggaattataattacgttatagattgttaggaagtctaactctaaacctttgagagagatattcaactgaaatctatcaggccggttagcacacctgtaatggtgttgaaggttttaattgttactttcctttacaatcatatggtttccaaccacttag                                                                                                  |
|          |          |                                                                                                                                                                                                                                                                                                                                                  |
| <b>F</b> | 440-500  | NLDSKVGGNYNYLYRLFRKSNLKPFERDISTEIQAGSTPCNGVEGFNCYFPLQSYGFQPT                                                                                                                                                                                                                                                                                     |
|          |          | aatcttgattctaaggttggtggaattataattacgttatagattgttaggaagtctaactctaaacctttgagagagatattcaactgaaatctatcaggccggttagcacacctgtaatggtgttgaaggttttaattgttactttcctttacaatcatatggtttccaaccacttag                                                                                                                                                             |
|          |          |                                                                                                                                                                                                                                                                                                                                                  |
| <b>G</b> | 420-540  | DYNYKLDDFTGCVIAWNSNNLDSKVGGNYNYLYRLFRKSNLKPFERDISTEIQAGSTPCNGVEGFNCYFPLQSYGFQPTNGVGYQPYRVVLSFELLHAPATVCGPKKSTNLVKNKCVN                                                                                                                                                                                                                           |
|          |          | gattataattataaattaccagatgattttacaggctgcgttatagcttgaattctaacaatcttgattctaaggttggtggaattataattacgttatagattgttaggaagtctaactctaaacctttgagagagatattcaactgaaatctatcaggccggttagcacacctgtaatggtgttgaaggttttaattgttactttcctttacaatcatatggtttccaaccactaatggtgttggttaccaaccatacagtagtagtactttcctttgaacttctacatgcaccagcaactgttggacctaataaagtctactaatttggttaa |
|          |          | aaacaaatgtgtcaattag                                                                                                                                                                                                                                                                                                                              |
| <b>H</b> | 481-540  | NGVEGFNCYFPLQSYGFQPTNGVGYQPYRVVLSFELLHAPATVCGPKKSTNLVKNKCVN                                                                                                                                                                                                                                                                                      |
|          |          | aatggtgttgaaggttttaattgttactttcctttacaatcatatggtttccaaccactaatggtgttggttaccaaccatacagagtagtagtactttcctttgaacttctacatgcaccagcaactgttggacctaataaagtctactaatttggttaaaacaaatgtgtcaattag                                                                                                                                                              |
|          |          |                                                                                                                                                                                                                                                                                                                                                  |
| <b>I</b> | 475-500  | AGSTPCNGVEGFNCYFPLQSYGFQPT                                                                                                                                                                                                                                                                                                                       |

|       |          |                                                                                                                                                                                                                                               |
|-------|----------|-----------------------------------------------------------------------------------------------------------------------------------------------------------------------------------------------------------------------------------------------|
|       |          | <div>gccggtagcacacctgtaatggtgtgaaggtttaattgttactttcctttacaatcatatggttccaaccacttag</div>                                                                                                                                                       |
| J     | 520-540  | <div>APATVCGPKKSTNLVKNKCVN</div> <div>gcaccagcaactgtttgtggacctaanaagctactaatttggttaaaacaaatgtgtcaattag</div>                                                                                                                                  |
| K     | 660-680  | <div>YECDIPIGAGICASYQTQNS</div> <div>tatgagtgtgacataccattggtgcaggtatatgcgctagtatcagactcagactaattcttag</div>                                                                                                                                   |
| L     | 660-710  | <div>YECDIPIGAGICASYQTQNSPRRARSVASQSIIAYTMSLGAENSVAYSNN</div> <div>tatgagtgtgacataccattggtgcaggtatatgcgctagtatcagactcagactaattctctcggcgggcacgtagttag</div> <div>ctagtcaatccatcattgcctacactatgtcacttggtgcagaaaattcagttgcttactctaataactag</div> |
| M     | 990-1035 | <div>EVQIDRLITGRLQSLQTYVTQQLIRAAEIRASANLAATKMSECVLG</div> <div>gaagtgcaaattgataggtgatcacaggcagacttcaaagttgcagacatatgtgactcaacaattaattagagctgcaga</div> <div>aatcagagcttctgctaattctgtgctactaaaatgtcagagtgtgtacttgatag</div>                    |
| N     | 931-970  | <div>IGKIQDSLSTASALGKLQDVVNQNAQALNLTQKQSSNF</div> <div>attggcaaaattcaagactcactttctccacagcaagtcacttggaacttcaagatgtggtcaacaaaatgcacaagct</div> <div>ttaaacacgctgttaacaacttagctccaatttttag</div>                                                 |
| S21P2 | 709-727  | <div>PSKPSKRSFIEDLLFNKV</div> <div>CCCAGCAAGCCCAGCAAGAGAAGCTTCATCGAGGACCTGCTGTTCAACAAGGTGTGA</div>                                                                                                                                            |
| S14P5 | 552-570  | <div>TESNKKFLPFQQFGRDIA</div> <div>ACCGAGAGCAACAAGAAGTTCCTGCCCTTCAGCAGTTCGGCAGAGACATCGCCTGA</div>                                                                                                                                             |

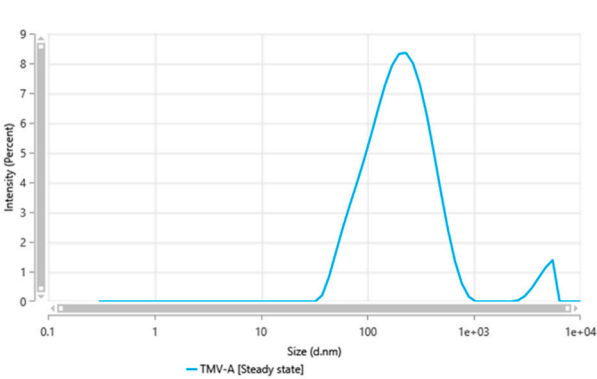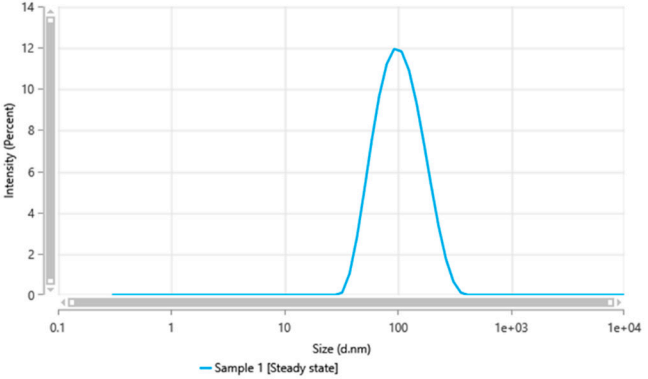

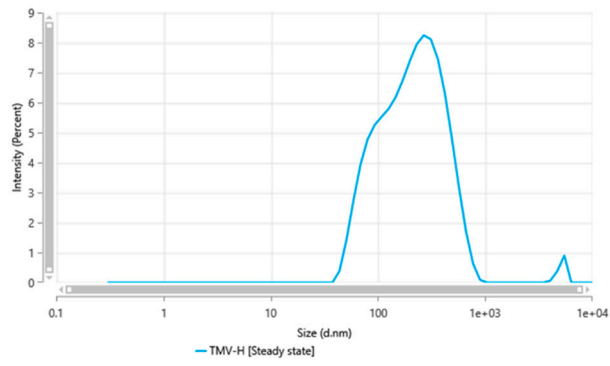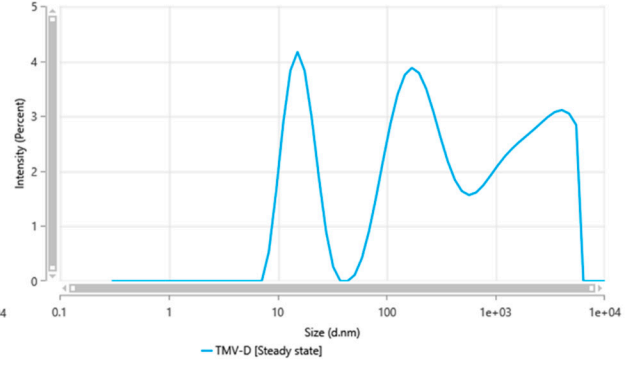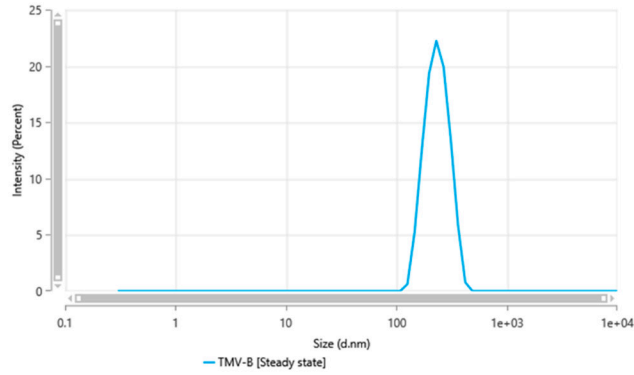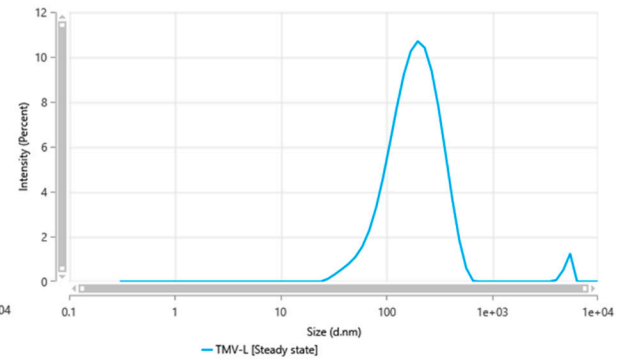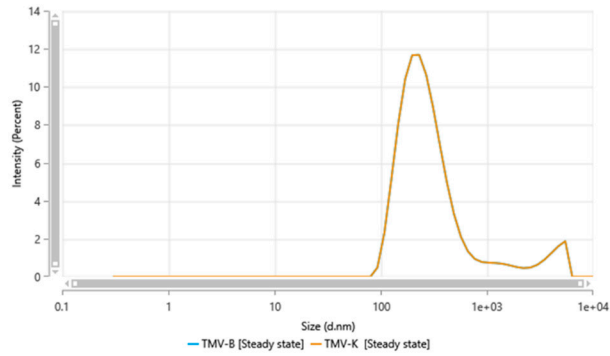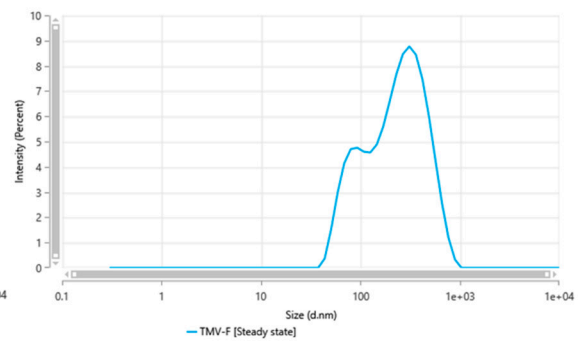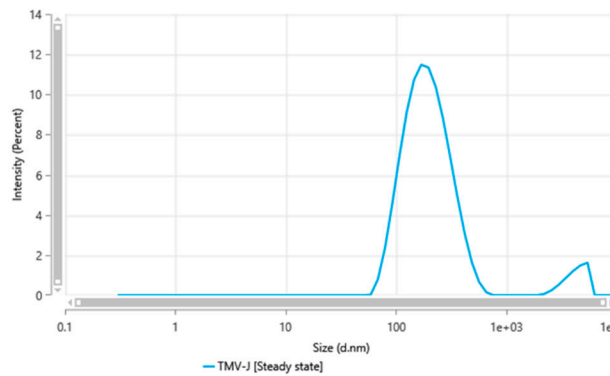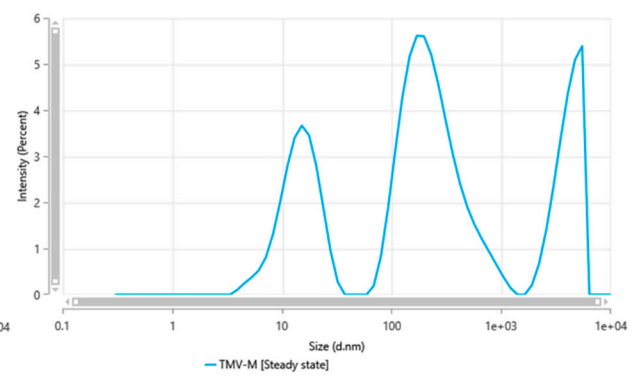

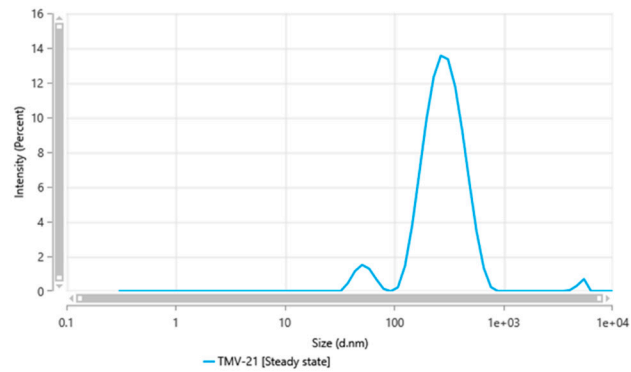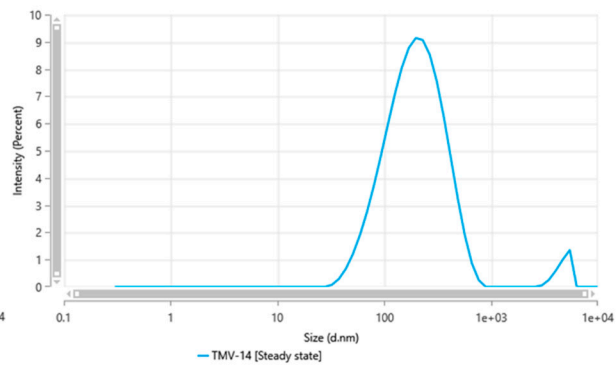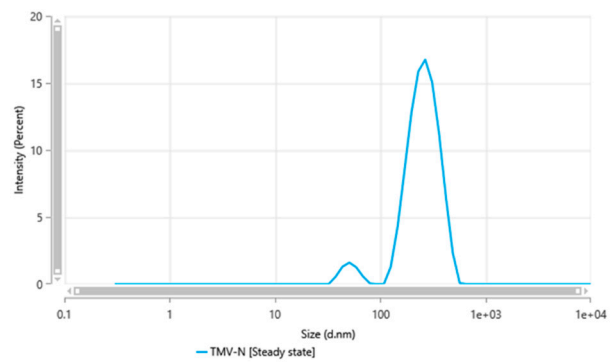

Supplement: s1 [file s1]
